# Supplementary material for: Light-stable polypyridine silver(i) complexes of 1,3,5-triaza-7-phosphaadamantane (PTA) and 1,3,5-triaza-7-phosphaadamantane-7-sulfide (PTAS): significant antiproliferative activity of representative examples in aqueous media
Source: Royal Society of Chemistry journal article supplement (doi:10.1039/c9dt01646e), 2019-01-01
Supplement: c9dt01646e1.pdf [file c9dt01646e1.pdf]

**Light-stable Polypyridine Silver(I) Complexes of 1,3,5-Triaza-7-phosphaadamantane (PTA) and 1,3,5-Triaza-7-phosphaadamantane-7-sulfide (PTA=S): Significant Antiproliferative Activity of Representative Examples in Aqua Media**

Sabina W. Jaros<sup>a</sup>, Urszula Śliwińska-Hill<sup>b</sup>, Agata Białońska<sup>a</sup>, Dmytro S. Nesterov<sup>c</sup>, Jerzy Sokolnicki<sup>a</sup>, Piotr Kuropka<sup>d</sup>, Barbara Bażanów<sup>b</sup> and Piotr Smoleński<sup>\*,a</sup>

<sup>a</sup> Faculty of Chemistry, University of Wrocław, F. Joliot-Curie 14, 50-383 Wrocław, Poland

<sup>b</sup> Department of Analytical Chemistry, Faculty of Pharmacy, Wrocław Medical University, Borowska 211 A, 50-566 Wrocław, Poland

<sup>c</sup> Centro de Química Estrutural, Instituto Superior Técnico, Universidade de Lisboa, Av. Rovisco Pais, 1049-001 Lisboa, Portugal

<sup>b</sup> Department of Veterinary Microbiology, Wrocław University of Environmental and Life Sciences, Norwida 31, 50-375 Wrocław, Poland

<sup>d</sup> Department of Histology and Embryology, Wrocław University of Environmental and Life Sciences, Norwida 31, 50-375 Wrocław, Poland

\*Corresponding author.

E-mail addresses: [piotr.smolenski@chem.uni.wroc.pl](mailto:piotr.smolenski@chem.uni.wroc.pl) (P. Smoleński).

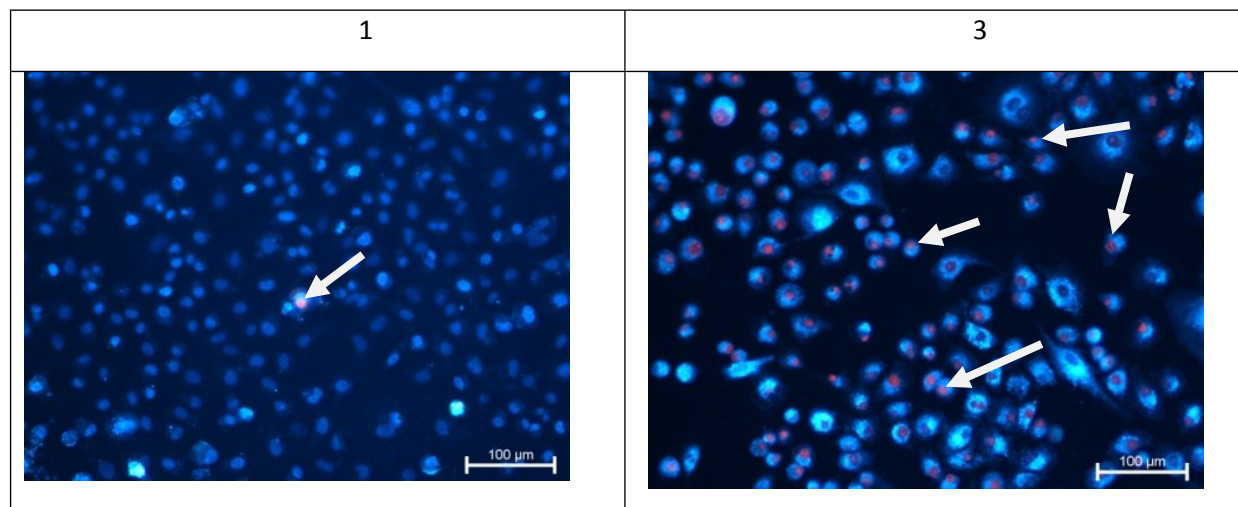

Figure S1. Image of the A549 cells after 4 hours incubation in volume 1000  $\mu$ l of DMEM. Visible single in group 1 (arrow) and multiple death or dying cells in group 3. DAPI and propidium iodide Mag 200x.

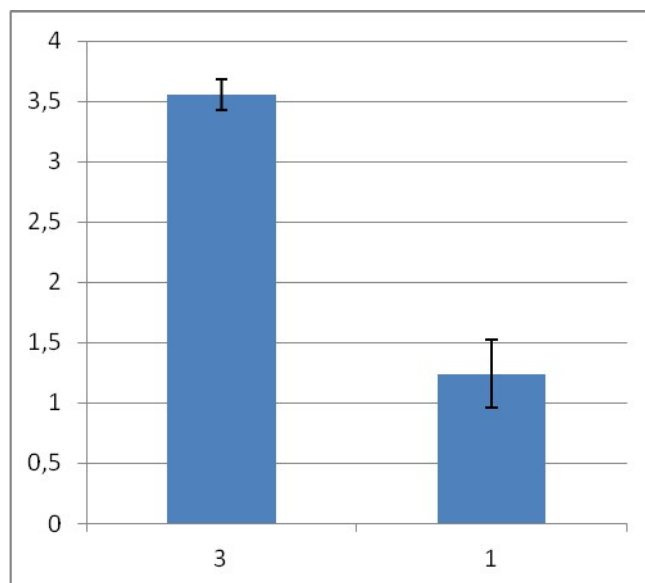

Figure S2. Morphometrical analysis of live/death cell ratio in A549 cell line after 4 hours of incubation in presence of **1** and **3**. The differences were statistically significant at  $p \leq 0,05$ .

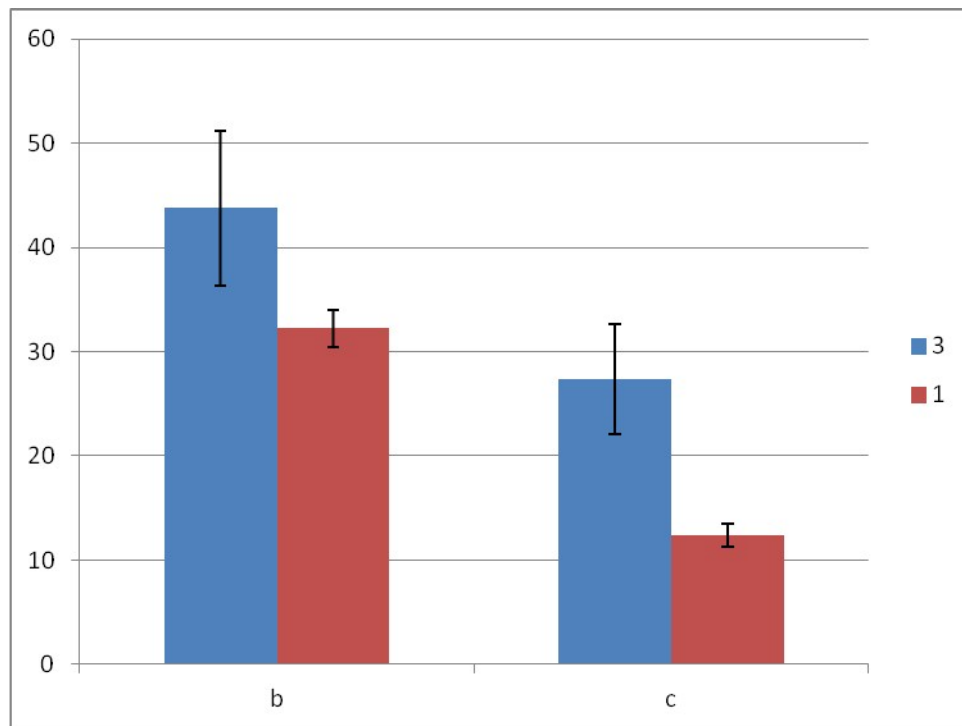

Figure S3. Morphometrical analysis of live/death cell ratio in A549 cell line after 12 hours of incubation at different concentrations of **1** and **3**. The differences were statistically significant at  $p \leq 0,05$ .
